# Supplementary material for: Glucose Testing for Adults Receiving Medicaid and Antipsychotics: A Population-Based Prescriber Survey on Behaviors, Attitudes, and Barriers
Source: Atypon-hosted journal article supplement (doi:10.1176/appi.ps.201500181), 2016-04-01
Supplement: appi.ps.201500181.ds001.pdf [file appi.ps.201500181.ds001.pdf]

**Appendix**

**Table of Contents**

Exhibit A1. Survey disposition ..... 1

Exhibit A2. Oral second generation antipsychotics ..... 2

Exhibit A3. Conceptual framework ..... 4

Exhibit A4. Survey methods and instrument ..... 8

Exhibit A5. Characteristics of survey population by response status ..... 13

Exhibit A6. Provider survey respondents: metabolic screening intent, barriers, attitudes, and capabilities ..... 15

Exhibit A7. Characteristics of the primary provider survey respondent cohort and those with complete data for modeling ..... 16

Exhibit A8. Unadjusted and adjusted relative risk of knowledge related to metabolic screening ..... 18

Exhibit A9. Unadjusted and adjusted relative risk of responsibility related to metabolic screening ..... 19

Exhibit A10. Unadjusted and adjusted relative risk of response efficacy related to metabolic screening ..... 20

Exhibit A11. Unadjusted and adjusted relative risk of self-efficacy related to metabolic screening ..... 21

Exhibit A12. Unadjusted and adjusted relative risk of advocacy related to metabolic screening ..... 22

Exhibit A13. Unadjusted and adjusted relative risk of practice barriers related to metabolic screening ..... 23

Exhibit A14. Unadjusted and adjusted relative risk of system barriers related to metabolic screening ..... 24

Exhibit A1. Survey disposition

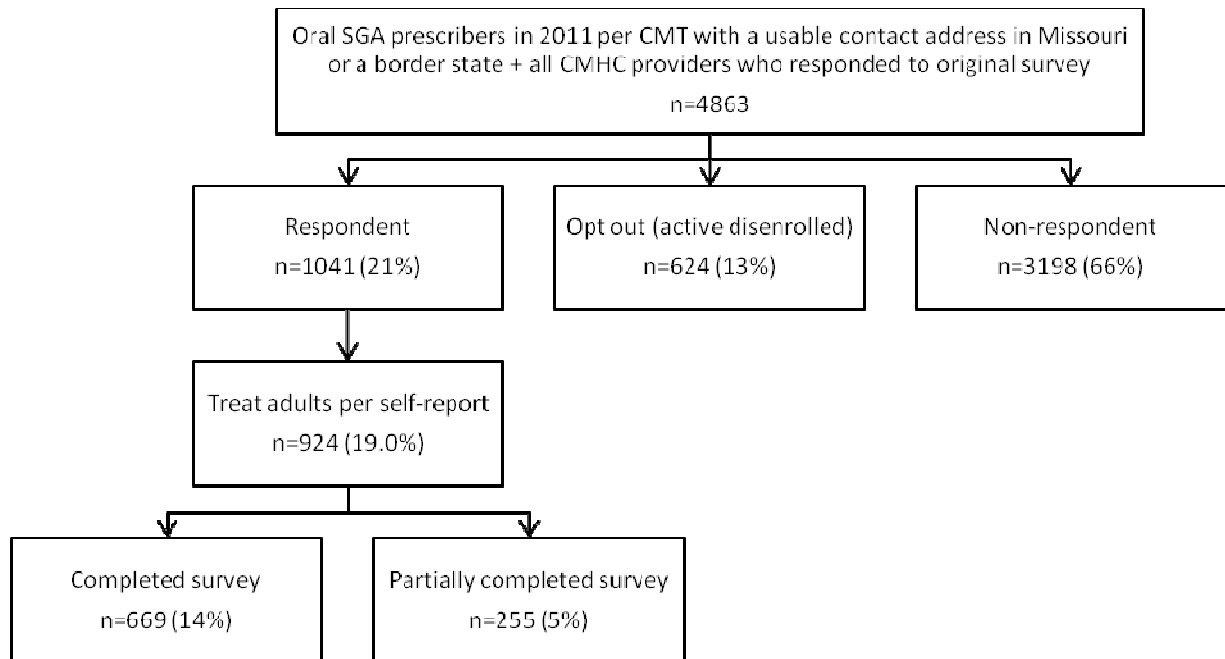

Effective response rate = 25% [1041 Respondents / (1041 Respondents + 3198 Non-Respondents)]

**Exhibit A2. Oral second generation antipsychotics**

ABILIFY  
ABILIFY DISMELT  
CLOZAPINE  
CLOZAPINE ODT  
CLOZARIL  
FANAPT  
FAZACLO  
GEODON  
INVEGA  
LATUDA  
OLANZAPINE  
OLANZAPINE ODT  
OLANZAPINE-FLUOXETINE HCL  
QUETIAPINE FUMARATE  
RISPERDAL  
RISPERDAL M-TAB  
RISPERIDONE  
RISPERIDONE M-TAB  
RISPERIDONE ODT  
SAPHRIS  
SEROQUEL  
SEROQUEL XR  
SYMBYAX  
ZIPRASIDONE HCL  
ZYPREXA  
ZYPREXA ZYDIS



Exhibit A3. Conceptual framework

Physician, practice, and patient factors affecting metabolic screening and follow-up treatment (with related implementation strategies) are shown in this Figure. This framework was constructed to inform survey question development and multi-level adjusted analyses.

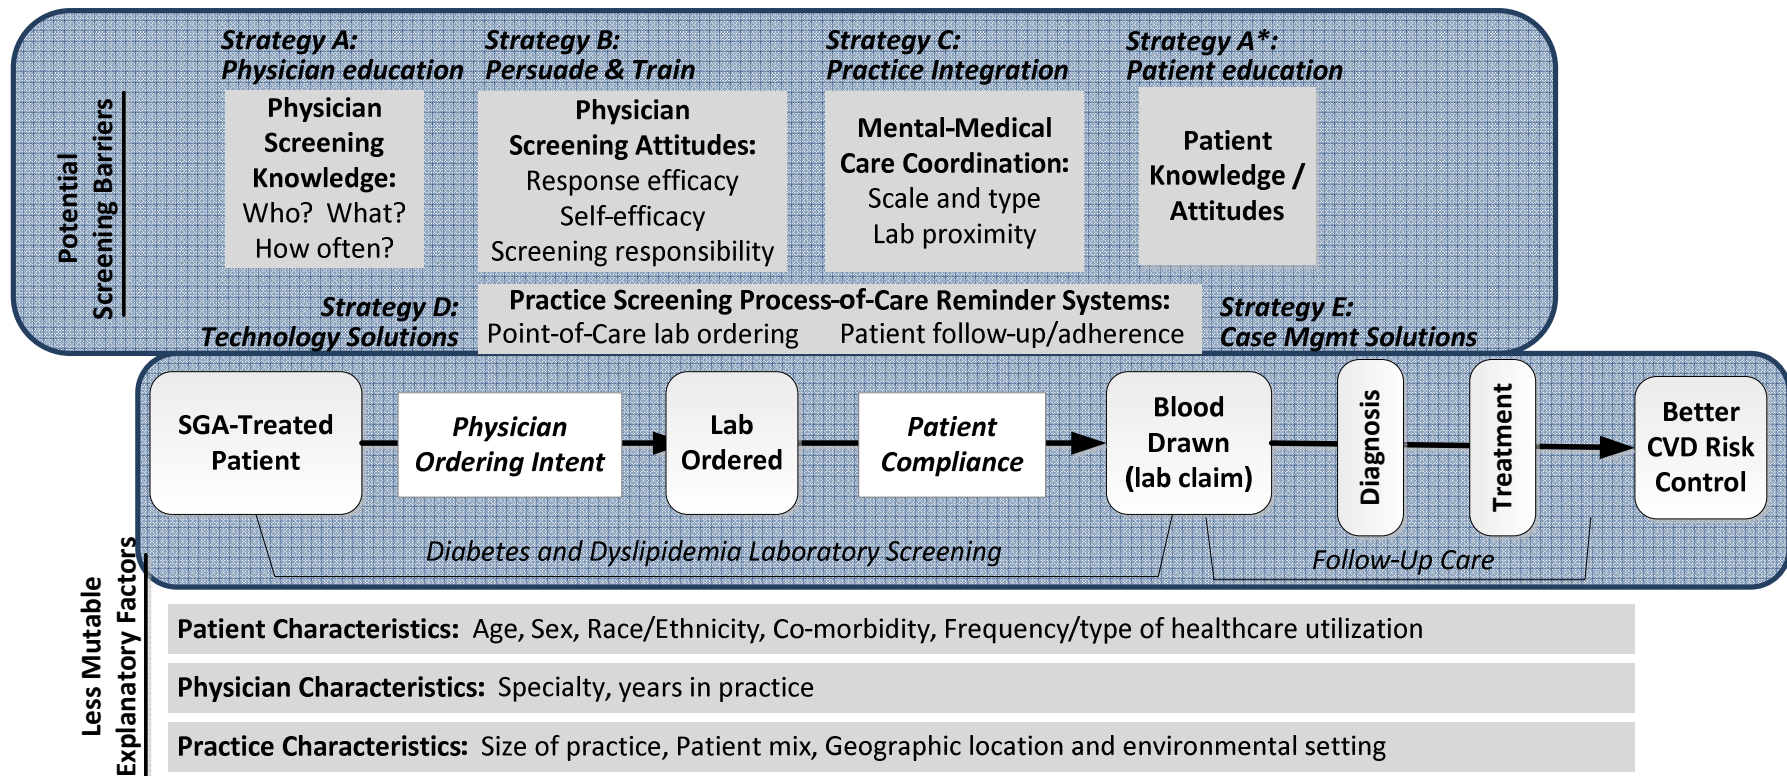

Rationale for survey question domains (in support of face validity)

### Behavioral Intent

This set of questions ascertains the physician's likelihood for ordering baseline and annual glucose and lipid testing. They represent one of the secondary measures of screening in the research plan. These questions are modeled after purchase-intent questioning used in consumer behavior research. Across a broad range of consumer products, conditions, these measures possess a statistically significant degree of predictive validity.

Baseline evaluation is ascertained in accordance with 2004 clinical recommendations from the American Diabetes Association and the American Psychiatric Association. Annual evaluation is ascertained as a measure of general follow-up. The Missouri Department of Mental Health recommends annual assessment of serum glucose and lipids for all patients with mental disorders.

The behavioral intent and open-ended questions are asked first so that the responses are not biased by the close-ended questions.

#### References

American Diabetes Association, American Psychiatric Association, American Association of Clinical Endocrinologists, North American Association for the Study of Obesity. Consensus Development Conference on Antipsychotic Drugs and Obesity and Diabetes. *Diabetes Care* 2004; 27(2): 596-601.

Bernard, H. Russell, and Gery W. Ryan. (2010). *Analyzing Qualitative Data: Systematic Approaches*. Los Angeles, CA: Sage Publications.

Daley MF, Crane LA, Markowitz LE, Black SR, Beaty BL, Barrow BJ, Babbel C, Gottlieb SL, Liddon N, Stokley S, Dickinson LM, Kempe A. Human papillomavirus vaccination practices: a survey of US physicians 18 months after licensure. *Pediatrics*. 2010; 126(3): 425-33.

Manohar U. Kalwani and Alvin J. Silk. On the Reliability and Predictive Validity of Purchase Intention Measures. *Inform Systems Institute for Operations Research and the Management Sciences*. 1982; 1(3): 243-286. Stable URL: <http://www.jstor.org/stable/183929>

### Knowledge of Monitoring Recommendations

This set of questions ascertains the physician's knowledge of which patient groups require diabetes and dyslipidemia screening. According to the American Diabetes Association and the American Psychiatric Association, all patients receiving second-generation (atypical) antipsychotics should receive glucose and lipid assessments when initiating therapy and then regularly thereafter independent of patient age, underlying diagnosis, and duration and type of medication (e.g., lower vs. higher propensity to induce metabolic disturbances). This set of questions is designed to determine whether physicians believe all patients require glucose and lipid testing or if testing should be triaged or reserved for groups perceived to be at higher risk (e.g., patients with serious mental illness, patients with substantial weight gain).

#### Reference

American Diabetes Association, American Psychiatric Association, American Association of Clinical Endocrinologists, North American Association for the Study of Obesity. Consensus Development Conference on Antipsychotic Drugs and Obesity and Diabetes. *Diabetes Care* 2004; 27(2): 596-601.

### Attitudes: Perceived Response Efficacy

This set of questions ascertains physician response efficacy for performing serum glucose and lipid testing. Response efficacy refers to a person's beliefs as to whether the recommended action step will actually avoid the threat. For example, will glucose screening improve cardiovascular outcomes? Individuals who perceive a greater need for threat avoidance have greater intentions and behaviors to avoid those threats. For example, in one study of family physicians, those who perceived a greater threat to patients from kidney disease demonstrated greater intentions and behaviors to test their patients' level of renal function.

## References

Maddux JE, Rogers RW. Protection Motivation and Self-Efficacy: A Revised Theory of Fear Appeals and Attitude Change. *Journal of Experimental Social Psychology*. 1983; 19:469-479.

Roberto AJ, Goodall CE. Using the Extended Parallel Process Model to Explain Physicians' Decisions to Test Their Patients for Kidney Disease. *Journal of Health Communication*, 2009; 24(4), 400 —412.

Roberto AJ, Goodall CE, West PM, Mahan JD> Persuading Physicians to Test Their Patients' Level of Kidney Functioning: The Effects of Message Frame and Point of View. *Journal of Health Communication* 2010; 25: 2, 107 — 118.

## **Attitudes: Perceived Screening Responsibility**

This set of questions ascertains how the physician perceives his or her responsibility for diabetes and dyslipidemia screening. We know that some psychiatrists believe that it is not their responsibility to manage the general health of their patients; it is the responsibility of the primary care physician. Other psychiatrists believe because they prescribe second generation (atypical) antipsychotics and these drugs induce metabolic abnormalities that they should be responsible for monitoring adverse health effects. We wish to understand how perceptions of screening responsibility relate to screening intent and observed screening rates.

These questions are selected from the reduced item measures from the Role Conflict and Role Ambiguity scale developed by Rizzo, House, and Lirtzman. Role conflict and ambiguity are important intervening variables that mediate the effects of various organizational practices on individuals and organizational outcomes. Because behavioral and physical health delivery are fragmented in the United States, we hypothesize that role conflict and ambiguity surrounding metabolic screening and management of persons with mental disorders may contribute to low screening rates.

## References

Fenton, W. S. and M. R. Chavez . Medication-Induced Weight Gain and Dyslipidemia in Patients With Schizophrenia. 2006. *Am J Psychiatry* 163(10): 1697-1704.

Jackson SE, Schuler RS. A Meta-Analysis and Conceptual Critique of Role Conflict and Ambiguity. 1983. *Journal of Applied Psychology*. 68: 320-323.

Rizzo JR, House RJ, Lirtzman SI. Role Conflict and Ambiguity in Complex Organizations. *Administrative Science Quarterly*. 1970; 15: 150-64.

## **Attitudes: Perceived Self-Efficacy**

This set of questions ascertains the physician's confidence in performing diabetes and dyslipidemia screening and diagnosis. According to Albert Bandura self-efficacy is "the belief in one's capabilities to organize and execute the courses of action required to manage prospective situations". Bandura and others have found that an individual's self-efficacy plays a major role in how goals, tasks, and challenges are approached. The concept of self-efficacy has been applied to physician behaviors, too. Knowledge of self-efficacy will permit better message tailoring for implementation interventions.

## References

Bandura, A. Self-efficacy: Toward a unifying theory of behavioral change. *Psychological Review*; 1977. 84, 191-215.

Bandura, A. (1995). *Self-Efficacy in Changing Societies*. Cambridge University Press.

Gerrity MS, Williams JW, Dietrick AJ, Olson AL. Identifying Physicians Likely to Benefit from Depression Education: A Challenge for Health Care Organizations. *Medical Care*. 2001; 39(8); 856-866.

Gramling R, Nash J, Siren K, Eaton C, Culpepper. Family Physician Self-Efficacy With Screening for Inherited Cancer Risk *Ann Fam Med* 2004;2:130-132. DOI: 10.1370/afm.60.

## **Coordination of Care**

This question asks the provider to classify the level of collaborative care between mental health and general medical care providers existing within their practice. The responses are from the Doherty, McDaniel, Baird Levels of Systemic Collaboration Model. The model describes degree of involvement and sophistication in

collaborative health care involving mental health professionals and other health professionals, particularly medical physicians. Options range from “minimal collaboration” to “close collaboration in a fully integrated system”.

#### References

Doherty, W. J., McDaniel, S. H., & Baird, M. A. (1996). Five levels of primary care/behavioral healthcare collaboration. *Behavioral Healthcare Tomorrow*, 25-28.

### **Attitudes: Perceived Screening Barriers**

This set of questions ascertains physician opinions about possible barriers related to metabolic screening of patients with mental illness taking antipsychotic medication. The hypothesized barriers correspond with the conceptual framework discussed in the Specific Aims of the proposed study and previous published research discussing potential barriers.

The open-ended questions on perceived barriers will be coded using qualitative research methods employed during survey piloting. The open-ended question serves as an additional double-check to identify any new themes or constructs affecting screening rates that are not measured via the close-ended questions.

#### References

Druss, B.G. (2007) Improving Medical Care for Persons with Serious Mental Illness: Challenges and Solutions. *J Clin Psychiatry* 68: 40-44.

Dunbar L, Brandt T, Wheeler A, and Harrison J. (2010) Barriers and Solutions to Implementing Metabolic Risk Assessment in a Secondary Mental Health Service. *Australas Psychiatry* 18: 322-325.

Mental Health America. (2008) Communicating About Health: A Mental Health America Survey of People with Schizophrenia and Providers, Vol. July 22, 2008.

Parks, J.J. (2007) Implementing Practice Guidelines: Lessons from Public Mental Health Settings. *J Clin Psychiatry* 68: 45-48.

### **Practice Systems**

This set of questions will be used to characterize the level of collaborative care and use of electronic reminder recall systems at the physician’s practice. The first question ascertains meaningful use of electronic health record system features, with special attention placed on those items most relevant to promoting diabetes and dyslipidemia screening. The responses are derived from the CMS meaningful use measures.

#### Reference

Centers for Medicare and Medicaid Services. EHR Incentive Program. Eligible Professional Meaningful Use Table of Contents: Core and Menu Set Measures. <https://www.cms.gov/EHRIncentivePrograms/Downloads/EP-MU-TOC.pdf>

### **Physician Characteristics**

This set of questions ascertains demographic characteristics that have been associated with the diffusion of medical innovation (e.g., size and type of practice, number of years in practice). We hypothesize that these factors may be associated with the adoption of diabetes and dyslipidemia screening recommendations for adults receiving antipsychotic medications.

#### Reference

Rogers, E. M. (2003). Diffusion of Innovations. New York, Free Press.



## Exhibit A4. Survey methods and instrument

### Provider Survey Methods

Wave I: In late 2011-2012, all CMHC providers in the state of Missouri (n=212) were surveyed about their intentions, attitudes, beliefs, and barriers in relation to metabolic screening for patients initiating oral second-generation antipsychotics (SGA) or continuously taking these medications.

Wave II: In 2013 we surveyed all providers who had prescribed an oral SGA to an adult Missouri Medicaid patient during 2011. Providers were originally identified by Care Management Technologies. Subsequently we received Medicaid pharmacy claims data for 2011 and were able to validate which providers had prescribed an oral SGA to an adult Medicaid patient during 2011.

Up to three survey attempts were made to each provider over the initial six week period. Extra contact measures were taken for providers who were validated to have prescribed an oral SGA to an adult Medicaid patient during 2011: attempts to rectify bad addresses were made using data from ProviderPRO (a publically available healthcare provider database), internet searches, and phone calls. A final attempt to reach non-responders was made via fax/phone. The timeline is outlined below.

CMHC providers who responded in Wave I received a one-page follow-up survey with additional questions previously not included in the Wave I survey.

| Week(s) | Activity                                                                                             |
|---------|------------------------------------------------------------------------------------------------------|
| -1      | Mail Preletter                                                                                       |
| 0       | Mail Survey #1                                                                                       |
| 1       | Mail Postcard                                                                                        |
| 3       | Mail Survey #2                                                                                       |
| 5       | Mail Survey #3                                                                                       |
| 7-9     | Identify all returned mail and attempt to update all addresses                                       |
| 10      | Re-Mail Preletter to returned mail group                                                             |
| 11      | Re-Mail Survey #1 to returned mail group                                                             |
| 12      | Re-Mail Postcard to returned mail group                                                              |
| 17      | Re-Mail Survey #2 to returned mail group<br>Send autodialer and fax to non-responders in first group |
| 19      | Re-Mail Survey #3 to returned mail group                                                             |
| 21      | Send autodialer and fax to returned mail group                                                       |

In a typical work week, how many outpatient visits do you provide? *Number of visits:* \_\_\_\_\_

▶ Of those, what percent are adults? \_\_\_\_\_%

In a typical work week, what percent of your adult patients are taking antipsychotics: \_\_\_\_\_%

▶ Of those, what percent have you personally prescribed? \_\_\_\_\_%

**I wish to contribute my expertise and clinical knowledge in this important survey.**

Please continue to question #1. (*Place an 'X' in the box of the one best answer for each question.*)

**I do not wish to participate in this survey.**

*Please check box and mail back in postage-paid envelope or below address to be removed from future mailings.*

1. Consider the following scenario for an **ADULT** patient who is/will be receiving antipsychotic medication.

You prescribe a second-generation (atypical) antipsychotic (SGA). The patient may be newly diagnosed or hasn't taken antipsychotic medication for at least 12 months and is re-starting medication.

**How likely would you be to . . .**

|                                              | Definitely               | Probably                 | Probably Not             | Definitely Not           | Not Applicable           |
|----------------------------------------------|--------------------------|--------------------------|--------------------------|--------------------------|--------------------------|
| Order a blood glucose test? (fasting or A1C) | <input type="checkbox"/> |
| Order a lipids profile?                      | <input type="checkbox"/> |

At the one-year follow-up visit, they are continuing to take their SGA medication. You may or may not have had to switch or augment medications. A year has passed. You are seeing them again for a follow-up visit.

**How likely would you be to . . .**

|                                              | Definitely               | Probably                 | Probably Not             | Definitely Not           | Not Applicable           |
|----------------------------------------------|--------------------------|--------------------------|--------------------------|--------------------------|--------------------------|
| Order a blood glucose test? (fasting or A1C) | <input type="checkbox"/> |
| Order a lipids profile?                      | <input type="checkbox"/> |

Their glucose test reveals that they have an abnormally elevated lab value--for example, greater than 6.9 mmol/L (125 mg/dL) in a fasting glucose test or an A1C of 6.5 percent or higher.

**How likely would you be to . . .**

|                                                | Definitely               | Probably                 | Probably Not             | Definitely Not           | Not Applicable           |
|------------------------------------------------|--------------------------|--------------------------|--------------------------|--------------------------|--------------------------|
| Order a confirmatory blood glucose test?       | <input type="checkbox"/> |
| Prescribe anti-diabetic medication?            | <input type="checkbox"/> |
| Refer the patient to a primary care physician? | <input type="checkbox"/> |
| Record and carefully monitor?                  | <input type="checkbox"/> |

2. How likely are you to **recommend** glucose testing for adults taking antipsychotics **to a colleague**?

Extremely

Neutral

Not At

Likely

All Likely

3. How strongly do you agree or disagree with the following statements about **roles and responsibility for metabolic screening and management** of your patients taking antipsychotic medication?

|                                                             | Agree Strongly           | Agree Somewhat           | Disagree Somewhat        | Disagree Strongly        |
|-------------------------------------------------------------|--------------------------|--------------------------|--------------------------|--------------------------|
| My practice is responsible for glucose and lipid screening. | <input type="checkbox"/> | <input type="checkbox"/> | <input type="checkbox"/> | <input type="checkbox"/> |
| I am responsible for diabetes and dyslipidemia management.  | <input type="checkbox"/> | <input type="checkbox"/> | <input type="checkbox"/> | <input type="checkbox"/> |
| I assume patients are getting screening somewhere else.     | <input type="checkbox"/> | <input type="checkbox"/> | <input type="checkbox"/> | <input type="checkbox"/> |

4. Based on your **understanding of metabolic monitoring recommendations** for **ADULTS** and without looking at other sources of information, please indicate whether you agree or disagree with the following statements.

|                                                                                                                              | Agree Strongly           | Agree Somewhat           | Disagree Somewhat        | Disagree Strongly        | Don't Know               |
|------------------------------------------------------------------------------------------------------------------------------|--------------------------|--------------------------|--------------------------|--------------------------|--------------------------|
| All adults starting SGA drugs should have a baseline glucose and lipid test.                                                 | <input type="checkbox"/> |
| SGA-treated adults without significant weight gain do not require glucose and lipid monitoring.                              | <input type="checkbox"/> |
| If I prescribe an antipsychotic with a lower metabolic risk profile, then glucose and lipid monitoring are not as necessary. | <input type="checkbox"/> |
| Glucose and lipid monitoring are necessary even if I prescribe low-dose antipsychotics for a short duration.                 | <input type="checkbox"/> |
| SGA-treated adults without diabetes and cardiovascular risk factors do not require glucose and lipid monitoring.             | <input type="checkbox"/> |

5. How strongly do you agree or disagree with the following statements about your **expectations concerning metabolic risks** for your **ADULT** patients taking antipsychotic medication?

|                                                                                            | Agree Strongly           | Agree Somewhat           | Disagree Somewhat        | Disagree Strongly        |
|--------------------------------------------------------------------------------------------|--------------------------|--------------------------|--------------------------|--------------------------|
| My patients are at high risk for diabetes.                                                 | <input type="checkbox"/> | <input type="checkbox"/> | <input type="checkbox"/> | <input type="checkbox"/> |
| When one of my patients develops diabetes, the chance for effective treatment is high.     | <input type="checkbox"/> | <input type="checkbox"/> | <input type="checkbox"/> | <input type="checkbox"/> |
| My adult patients are at high risk for dyslipidemia.                                       | <input type="checkbox"/> | <input type="checkbox"/> | <input type="checkbox"/> | <input type="checkbox"/> |
| When one of my patients develops dyslipidemia, the chance for effective treatment is high. | <input type="checkbox"/> | <input type="checkbox"/> | <input type="checkbox"/> | <input type="checkbox"/> |
| Overall, metabolic monitoring improves cardiovascular outcomes for my patients.            | <input type="checkbox"/> | <input type="checkbox"/> | <input type="checkbox"/> | <input type="checkbox"/> |

6. How confident are you in **performing the following clinical tasks?**

|                                                            | Very Confident           | Mostly Confident         | Somewhat Confident       | Not Confident            |
|------------------------------------------------------------|--------------------------|--------------------------|--------------------------|--------------------------|
| Ordering blood glucose testing.                            | <input type="checkbox"/> | <input type="checkbox"/> | <input type="checkbox"/> | <input type="checkbox"/> |
| Interpreting blood glucose values and diagnosing diabetes. | <input type="checkbox"/> | <input type="checkbox"/> | <input type="checkbox"/> | <input type="checkbox"/> |
| Ordering lipids testing.                                   | <input type="checkbox"/> | <input type="checkbox"/> | <input type="checkbox"/> | <input type="checkbox"/> |

|                                                             |                          |                          |                          |                          |
|-------------------------------------------------------------|--------------------------|--------------------------|--------------------------|--------------------------|
| Interpreting lipid values and diagnosing dyslipidemia.      | <input type="checkbox"/> | <input type="checkbox"/> | <input type="checkbox"/> | <input type="checkbox"/> |
| Clinically managing patients who are taking antipsychotics. | <input type="checkbox"/> | <input type="checkbox"/> | <input type="checkbox"/> | <input type="checkbox"/> |

7. How strongly do you agree or disagree with the following statements about **possible barriers to your ability to screen and monitor** your patients taking antipsychotic medication for diabetes and dyslipidemia?

|                                                                                   | Agree Strongly           | Agree Somewhat           | Disagree Somewhat        | Disagree Strongly        |
|-----------------------------------------------------------------------------------|--------------------------|--------------------------|--------------------------|--------------------------|
| <b><i>Patient Factors: Glucose and Lipid Screening</i></b>                        |                          |                          |                          |                          |
| A. Patients refuse to get lab work done.                                          | <input type="checkbox"/> | <input type="checkbox"/> | <input type="checkbox"/> | <input type="checkbox"/> |
| B. Patients forget to get lab work.                                               | <input type="checkbox"/> | <input type="checkbox"/> | <input type="checkbox"/> | <input type="checkbox"/> |
| C. Fasting makes it difficult for my patients to comply.                          | <input type="checkbox"/> | <input type="checkbox"/> | <input type="checkbox"/> | <input type="checkbox"/> |
| D. Lab work for patients is cost prohibitive.                                     | <input type="checkbox"/> | <input type="checkbox"/> | <input type="checkbox"/> | <input type="checkbox"/> |
| E. The added time or needed transportation is inconvenient for patients.          | <input type="checkbox"/> | <input type="checkbox"/> | <input type="checkbox"/> | <input type="checkbox"/> |
| F. Patients do not see screening as a priority.                                   | <input type="checkbox"/> | <input type="checkbox"/> | <input type="checkbox"/> | <input type="checkbox"/> |
| <b><i>Clinical Practice Factors: Measuring Glucose and Lipids</i></b>             |                          |                          |                          |                          |
| G. I do not have adequate time.                                                   | <input type="checkbox"/> | <input type="checkbox"/> | <input type="checkbox"/> | <input type="checkbox"/> |
| H. I do not have the necessary equipment at my office/clinic.                     | <input type="checkbox"/> | <input type="checkbox"/> | <input type="checkbox"/> | <input type="checkbox"/> |
| I. I do not know at point-of-care who needs screening.                            | <input type="checkbox"/> | <input type="checkbox"/> | <input type="checkbox"/> | <input type="checkbox"/> |
| J. I do not know which patients are following lab orders.                         | <input type="checkbox"/> | <input type="checkbox"/> | <input type="checkbox"/> | <input type="checkbox"/> |
| K. I have difficulty getting the lab results if done elsewhere.                   | <input type="checkbox"/> | <input type="checkbox"/> | <input type="checkbox"/> | <input type="checkbox"/> |
| L. Screening adds complexity to my clinical workload.                             | <input type="checkbox"/> | <input type="checkbox"/> | <input type="checkbox"/> | <input type="checkbox"/> |
| <b><i>Other Factors Related to Patients Taking Antipsychotic Medications</i></b>  |                          |                          |                          |                          |
| M. Metabolic screening guidelines are unclear.                                    | <input type="checkbox"/> | <input type="checkbox"/> | <input type="checkbox"/> | <input type="checkbox"/> |
| N. At this time, metabolic screening is not a priority for me or my organization. | <input type="checkbox"/> | <input type="checkbox"/> | <input type="checkbox"/> | <input type="checkbox"/> |

8. Mark the **ONE LETTER** corresponding to the above barrier that you believe is the **MOST IMPORTANT BARRIER** to screening.

| A                                                             | B                        | C                        | D                        | E                        | F                        | G                        | H                        | I                        | J                        | K                        | L                        | M                        | N                        |
|---------------------------------------------------------------|--------------------------|--------------------------|--------------------------|--------------------------|--------------------------|--------------------------|--------------------------|--------------------------|--------------------------|--------------------------|--------------------------|--------------------------|--------------------------|
| <input type="checkbox"/>                                      | <input type="checkbox"/> | <input type="checkbox"/> | <input type="checkbox"/> | <input type="checkbox"/> | <input type="checkbox"/> | <input type="checkbox"/> | <input type="checkbox"/> | <input type="checkbox"/> | <input type="checkbox"/> | <input type="checkbox"/> | <input type="checkbox"/> | <input type="checkbox"/> | <input type="checkbox"/> |
| <input type="checkbox"/> <b>Other</b> , please specify: _____ |                          |                          |                          |                          |                          |                          |                          |                          |                          |                          |                          |                          |                          |

9. Do you currently use an **Electronic Medical Record (EMR)** or **Electronic Health Record (EHR)** system?

|                                                                                                                             | Agree                    | Disagree                 | Don't Know or Not Sure   |
|-----------------------------------------------------------------------------------------------------------------------------|--------------------------|--------------------------|--------------------------|
| <input type="checkbox"/> NO (skip to Question 10)                                                                           |                          |                          |                          |
| <input type="checkbox"/> YES, I use my EMR/EHR to ...                                                                       |                          |                          |                          |
| A. Record and chart changes in patient vitals, including height/weight.                                                     | <input type="checkbox"/> | <input type="checkbox"/> | <input type="checkbox"/> |
| B. Implement a clinical decision support rule relevant to my specialty with the ability to track compliance with that rule. | <input type="checkbox"/> | <input type="checkbox"/> | <input type="checkbox"/> |
| C. Exchange diagnostic test results with other providers of care.                                                           | <input type="checkbox"/> | <input type="checkbox"/> | <input type="checkbox"/> |
| D. Track clinical lab-test results as structured data                                                                       | <input type="checkbox"/> | <input type="checkbox"/> | <input type="checkbox"/> |
| E. Alert me when tests are need                                                                                             | <input type="checkbox"/> | <input type="checkbox"/> | <input type="checkbox"/> |
| F. Maintain a patient medication allergy list                                                                               | <input type="checkbox"/> | <input type="checkbox"/> | <input type="checkbox"/> |

- G. Send patient reminders for follow-up care.
- H. E-prescribe

10. Do you currently have the capabilities to draw blood at your practice?  Yes  No

11. Do you obtain glucose or lipid lab values immediately at your practice using point-of-care testing?  Yes  No

12. Please select the one response that best describes the **level of collaboration between mental health and medical health providers** at the setting where you see most of your patients.

- Work in separate facilities with separate systems.
- Work in separate facilities with separate systems, but engage in periodic communication about shared patients.
- Share the same facility, but work in separate systems.
- Share the same facility and have some systems in common, such as scheduling or charting/EMR/EHR.
- Share the same facility and the same systems.

13. How often do you use the following sources of information **to learn about new medical evidence?**

*New evidence can include treatment guidelines, comparative effectiveness data, drug safety and patient risk management recommendations, and new models of health care delivery.*

|                                                                          | Never                    | Occasionally             | Frequently               |
|--------------------------------------------------------------------------|--------------------------|--------------------------|--------------------------|
| Medical colleagues: in person                                            | <input type="checkbox"/> | <input type="checkbox"/> | <input type="checkbox"/> |
| Medical colleagues: via social media (e.g., physician discussion boards) | <input type="checkbox"/> | <input type="checkbox"/> | <input type="checkbox"/> |

**This last set of questions will help us classify survey respondents.**

14. Which best describes your area of expertise?

- Primary Care (Family Medicine, Internal Medicine)
- Psychiatry (General, Child and Adolescent)
- Other clinical specialty/subspecialty area, *please specify* \_\_\_\_\_
- Advanced Practice Nurse Prescriber
- Physician Assistant

15. In your primary outpatient practice, roughly what percentages of your patients are in the following groups? (Please approximate; groups may not sum up to 100%)

|                   | 0%                       | 1-9%                     | 10-24%                   | 25-49%                   | 50-74%                   | 75-100%                  |
|-------------------|--------------------------|--------------------------|--------------------------|--------------------------|--------------------------|--------------------------|
| Private Insurance | <input type="checkbox"/> |
| Medicaid          | <input type="checkbox"/> |
| Uninsured         | <input type="checkbox"/> |

16. Which of the following best describes your practice?

- Stand-alone practice**  
 How many providers are at your practice? \_\_\_\_\_
- Part of a multi-site system**

17. What is your gender?  Male  Female

18. In what year were you born? 19 \_\_\_\_\_

19. How many years have you been in practice? *Number of years:* \_\_\_\_\_

20. Are you of Hispanic, Latino, or Spanish origin?

- Yes (Mexican, Mexican American, Chicano, Cuban, Puerto Rican, or Other)
- No

21. What is your race?

- American Indian or Alaska Native
- Black or African American
- Asian
- White
- Native Hawaiian or Other Pacific Islander
- Other, *please specify* \_\_\_\_\_

**Thank you for your input.**

If you would like the results of the survey, please provide an email address: \_\_\_\_\_

Please mail the survey back to us in the postage-paid envelope or to:

Elaine Morrato  
 University of Colorado Denver / Mail Stop F443  
 13199 E. Montview Blvd, Suite 300 Aurora, CO 80045

**Exhibit A5. Characteristics of survey population by response status**

|                                                                        | Survey population<br>(N=4863) |                                | Respondents who treat<br>adults (N=924) |                                | All others (N=3939) |                                | test<br>statistic | df | p     |
|------------------------------------------------------------------------|-------------------------------|--------------------------------|-----------------------------------------|--------------------------------|---------------------|--------------------------------|-------------------|----|-------|
|                                                                        | N or<br>median                | % or<br>interquartile<br>range | N or<br>median                          | % or<br>interquartile<br>range | N or<br>median      | % or<br>interquartile<br>range |                   |    |       |
| <b>Provider</b>                                                        |                               |                                |                                         |                                |                     |                                |                   |    |       |
| Specialty-Setting <sup>a</sup>                                         |                               |                                |                                         |                                |                     |                                | 531.78            | 3  | <.001 |
| Behavioral health (CMHC)                                               | 193                           | 4                              | 156                                     | 17                             | 37                  | 1                              |                   |    |       |
| Behavioral health (non-CMHC)                                           | 506                           | 10                             | 103                                     | 11                             | 403                 | 10                             |                   |    |       |
| Primary care                                                           | 2,418                         | 50                             | 451                                     | 49                             | 1,967               | 50                             |                   |    |       |
| Other                                                                  | 1,746                         | 36                             | 214                                     | 23                             | 1,532               | 39                             |                   |    |       |
| Birth cohort <sup>b</sup>                                              |                               |                                |                                         |                                |                     |                                | 3.75              | 3  | .290  |
| 'G.I./silent generation' (1901-1945)                                   | 351                           | 7                              | 78                                      | 8                              | 273                 | 7                              |                   |    |       |
| 'Baby boomers' (1946-1964)                                             | 1,900                         | 39                             | 370                                     | 40                             | 1,530               | 39                             |                   |    |       |
| 'Generation X' (1965-1985)                                             | 1,316                         | 27                             | 237                                     | 26                             | 1,079               | 27                             |                   |    |       |
| Missing                                                                | 1,296                         | 27                             | 239                                     | 26                             | 1,057               | 27                             |                   |    |       |
| Gender <sup>b</sup>                                                    |                               |                                |                                         |                                |                     |                                | 9.74              | 2  | .008  |
| Female                                                                 | 1,234                         | 25                             | 252                                     | 27                             | 982                 | 25                             |                   |    |       |
| Male                                                                   | 2,859                         | 59                             | 556                                     | 60                             | 2,303               | 59                             |                   |    |       |
| Missing                                                                | 770                           | 16                             | 116                                     | 13                             | 654                 | 17                             |                   |    |       |
| Title <sup>b</sup>                                                     |                               |                                |                                         |                                |                     |                                | 33.78             | 3  | <.001 |
| MD                                                                     | 3,216                         | 66                             | 591                                     | 64                             | 2,625               | 67                             |                   |    |       |
| DO                                                                     | 712                           | 15                             | 165                                     | 18                             | 547                 | 14                             |                   |    |       |
| Other                                                                  | 160                           | 3                              | 51                                      | 6                              | 109                 | 3                              |                   |    |       |
| Missing                                                                | 775                           | 16                             | 117                                     | 13                             | 658                 | 17                             |                   |    |       |
| State <sup>a,b</sup>                                                   |                               |                                |                                         |                                |                     |                                | .02               | 2  | .991  |
| MO                                                                     | 4,248                         | 87                             | 806                                     | 87                             | 3,442               | 87                             |                   |    |       |
| KS                                                                     | 288                           | 6                              | 55                                      | 6                              | 233                 | 6                              |                   |    |       |
| Other border state                                                     | 327                           | 7                              | 63                                      | 7                              | 264                 | 7                              |                   |    |       |
| Urban setting <sup>a-c</sup>                                           | 3,363                         | 69                             | 601                                     | 65                             | 2,762               | 70                             | 9.37              | 1  | .002  |
| <b>Practice</b>                                                        |                               |                                |                                         |                                |                     |                                |                   |    |       |
| Office size <sup>b</sup>                                               | 4                             | 2-14                           | 4                                       | 1-10                           | 4                   | 2-15                           | 12.86             | 1  | <.001 |
| Number of employees <sup>b</sup>                                       | 13                            | 6-53                           | 13                                      | 3-40                           | 16                  | 6-54                           | 13.05             | 1  | <.001 |
| <b>Prescribing Trends<sup>d</sup></b>                                  |                               |                                |                                         |                                |                     |                                |                   |    |       |
| Oral SGA prescriber for a Medicaid patient in CY2011, %                | 4,824                         | 99                             | 893                                     | 97                             | 3,931               | 100                            | 93.46             | 1  | <.001 |
| Oral SGA prescriber for an adult Medicaid patient in CY2011, %         | 4,072                         | 84                             | 799                                     | 87                             | 3,273               | 83                             | 6.28              | 1  | .012  |
| Count of adult Medicaid patients with an oral SGA prescription in 2011 | 2                             | 1-7                            | 3.5                                     | 1-17                           | 1                   | 1-5                            | 119.35            | 1  | <.001 |
| Count of oral SGA prescriptions for adults on Medicaid in 2011         | 5                             | 1-35                           | 15                                      | 2-80                           | 4                   | 1-23                           | 114.93            | 1  | <.001 |
| ...per unique patients                                                 | 2.5                           | 1-5                            | 3.8                                     | 1-6                            | 2                   | 1-5                            | 67.83             | 1  | <.001 |

SOURCE: Author's analysis of data from Care Management Technologies (CMT), ProviderPRO healthcare provider database, and 2011 Missouri Medicaid claims data.

NOTES: The column 'All Others' include non-respondents (n=3198), those who actively disenrolled (n=624), and respondents that did not indicate they treat adults (n=117). Urban setting excludes five observations with missing values. Percentages within categories may not add to 100% due to rounding. Test statistics, degrees of freedom (df), and p-values (p) are from Pearson's chi-square test of association (categorical variables) or the Kruskal-Wallis test (continuous variables) comparing characteristics between respondents who treat adults and all others.

SGA = second-generation antipsychotic.

<sup>a</sup> Data from CMT.

<sup>b</sup> Data from ProviderPRO.

<sup>c</sup> Urban setting is determined by the mailing zip code (from CMT and ProviderPRO) and the zip code level Rural-Urban Commuting Area Codes.

<sup>d</sup> Data from Medicaid claims data.

Exhibit A6. Provider survey respondents: metabolic screening intent, barriers, attitudes, and capabilities

|                                                                                     | Provider specialty |    |                 |    |                                   |       |                         |       |                  |       |
|-------------------------------------------------------------------------------------|--------------------|----|-----------------|----|-----------------------------------|-------|-------------------------|-------|------------------|-------|
|                                                                                     | Total<br>(N=924)   |    | CMHC<br>(N=156) |    | Psychiatry<br>non-CMHC<br>(N=136) |       | Primary Care<br>(N=499) |       | Other<br>(N=133) |       |
|                                                                                     | N                  | %  | N               | %  | N                                 | %     | N                       | %     | N                | %     |
| <b>Intent</b>                                                                       |                    |    |                 |    |                                   |       |                         |       |                  |       |
| Order confirmatory glucose test (if elevated)?                                      | 389                | 46 | 46              | 46 | 37                                | 29*   | 273                     | 56    | 33               | 25**  |
| <b>When glucose level is elevated, I...</b>                                         |                    |    |                 |    |                                   |       |                         |       |                  |       |
| Prescribe anti-diabetic medication?                                                 | 105                | 13 | 1               | 1  | 1                                 | 1     | 96                      | 20*** | 7                | 6     |
| Refer the patient to a primary care physician?                                      |                    |    |                 |    |                                   |       |                         |       |                  |       |
| Definitely                                                                          | 261                | 61 | 88              | 56 | 101                               | 74    | NA                      |       | 72               | 54*** |
| Other Response                                                                      | 106                | 25 | 15              | 10 | 32                                | 24    | NA                      |       | 59               | 44*** |
| Missing                                                                             | 58                 | 14 | 53              | 34 | 3                                 | 2     | NA                      |       | 2                | 2***  |
| Record and carefully monitor?                                                       | 590                | 69 | 78              | 78 | 103                               | 79    | 353                     | 72    | 56               | 43*** |
| <b>Barriers</b>                                                                     |                    |    |                 |    |                                   |       |                         |       |                  |       |
| <b>Patient</b>                                                                      |                    |    |                 |    |                                   |       |                         |       |                  |       |
| Patients refuse lab work.                                                           | 130                | 14 | 16              | 11 | 34                                | 26**  | 66                      | 13    | 14               | 11    |
| Lab work is cost prohibitive for patients.                                          | 94                 | 11 | 8               | 8  | 20                                | 15    | 55                      | 11    | 11               | 9     |
| <b>Practice</b>                                                                     |                    |    |                 |    |                                   |       |                         |       |                  |       |
| I do not have adequate time.                                                        | 35                 | 4  | 14              | 9  | 6                                 | 5     | 9                       | 2***  | 6                | 5     |
| I do not know who needs screening.                                                  | 28                 | 3  | 8               | 5  | 9                                 | 7     | 3                       | 1***  | 8                | 7     |
| I do not know which patients follow lab orders.                                     | 40                 | 4  | 19              | 12 | 5                                 | 4*    | 9                       | 2***  | 7                | 6     |
| <b>System</b>                                                                       |                    |    |                 |    |                                   |       |                         |       |                  |       |
| Metabolic screening guidelines are unclear.                                         | 34                 | 4  | 4               | 3  | 6                                 | 5     | 15                      | 3     | 9                | 7     |
| <b>Attitudes</b>                                                                    |                    |    |                 |    |                                   |       |                         |       |                  |       |
| <b>Responsibility</b>                                                               |                    |    |                 |    |                                   |       |                         |       |                  |       |
| I am responsible for diabetes management.                                           | 481                | 53 | 19              | 12 | 6                                 | 5     | 431                     | 87*** | 25               | 20    |
| Patients are getting screening elsewhere.                                           | 57                 | 7  | 4               | 4  | 10                                | 8     | 12                      | 2     | 31               | 25*** |
| <b>Knowledge</b>                                                                    |                    |    |                 |    |                                   |       |                         |       |                  |       |
| <b>Some patients do not require monitoring:</b>                                     |                    |    |                 |    |                                   |       |                         |       |                  |       |
| Patients without significant weight gain.                                           | 17                 | 2  | 1               | 1  | 4                                 | 3     | 8                       | 2     | 4                | 3     |
| If I prescribe an SGA with lower risk.                                              | 12                 | 1  | 1               | 1  | 6                                 | 4     | 4                       | 1     | 1                | 1     |
| If I prescribe low-dose SGAs for a short duration.                                  | 246                | 27 | 68              | 45 | 46                                | 34    | 109                     | 22*** | 23               | 18*** |
| Patients without risk factors.                                                      | 15                 | 2  | 3               | 2  | 3                                 | 2     | 4                       | 1     | 5                | 4     |
| <b>Response efficacy</b>                                                            |                    |    |                 |    |                                   |       |                         |       |                  |       |
| The chance for effective treatment is high.                                         | 344                | 38 | 20              | 13 | 38                                | 28**  | 254                     | 51*** | 32               | 26*   |
| Overall, metabolic monitoring improves the cardiovascular outcomes for my patients. | 560                | 63 | 98              | 65 | 81                                | 62    | 322                     | 66    | 59               | 48*   |
| <b>Self-efficacy</b>                                                                |                    |    |                 |    |                                   |       |                         |       |                  |       |
| I am confident ordering testing.                                                    | 831                | 91 | 137             | 90 | 113                               | 84    | 482                     | 97*** | 99               | 78*   |
| I am confident managing SGA patients.                                               | 490                | 54 | 126             | 81 | 92                                | 69*   | 242                     | 49*** | 30               | 24*** |
| <b>Capabilities</b>                                                                 |                    |    |                 |    |                                   |       |                         |       |                  |       |
| I can draw blood at my practice.                                                    | 615                | 71 | 54              | 51 | 38                                | 28*** | 437                     | 88*** | 86               | 68*   |
| I can get immediate lab values with point of care tests.                            | 388                | 45 | 53              | 52 | 22                                | 16*** | 267                     | 54    | 46               | 37    |

SOURCE: Author's analysis of data from the provider survey.

NOTES: Reported values are given as column-% (n) of providers who responded "definitely", "strongly agree", "very confident", or "yes". Other responses include "probably", "probably not", "definitely not", "not applicable", "agree somewhat", "disagree somewhat", etc. Missing/skipped values have been excluded when < 10% for all specialties combined. Percentages within categories may not add to 100% due to rounding. Significance denotes differences between CMHC and each specialty tested by Pearson's chi-square test of association and adjusted for multiple comparisons with the Bonferroni method. \* p<.05, \*\* p<.01, \*\*\* p<.001.

CMHC = Community Mental Health Center; NA = Not Applicable; SGA = second-generation antipsychotic.



Exhibit A7. Characteristics of the primary provider survey respondent cohort and those with complete data for modeling

|                                                                      | Primary cohort<br>(N=924) |    | Model cohort<br>(N=669) |    | $\chi^2$ | df | p     |
|----------------------------------------------------------------------|---------------------------|----|-------------------------|----|----------|----|-------|
|                                                                      | N                         | %  | N                       | %  |          |    |       |
| <b>Provider</b>                                                      |                           |    |                         |    |          |    |       |
| Specialty-Setting                                                    |                           |    |                         |    | 83.35    | 3  | <.001 |
| Behavioral health (CMHC)                                             | 156                       | 17 | 69                      | 10 |          |    |       |
| Behavioral health (non-CMHC)                                         | 133                       | 14 | 90                      | 13 |          |    |       |
| Primary care                                                         | 499                       | 54 | 401                     | 60 |          |    |       |
| Other                                                                | 136                       | 15 | 109                     | 16 |          |    |       |
| Year of birth                                                        |                           |    |                         |    | 15.03    | 2  | <.001 |
| G.I./silent generation (1901-1945)                                   | 95                        | 10 | 55                      | 8  |          |    |       |
| Baby boomers (1946-1964)                                             | 480                       | 52 | 343                     | 51 |          |    |       |
| Generation X (1965-1985)                                             | 349                       | 38 | 271                     | 41 |          |    |       |
| Female                                                               | 320                       | 35 | 234                     | 35 | .13      | 1  | .721  |
| Race: White                                                          | 670                       | 79 | 546                     | 82 | 12.97    | 1  | <.001 |
| <b>Practice</b>                                                      |                           |    |                         |    |          |    |       |
| Practice type: stand-alone                                           | 332                       | 40 | 268                     | 40 | .22      | 1  | .642  |
| Shared mental health and medical health facilities                   | 217                       | 24 | 159                     | 24 | .05      | 1  | .827  |
| Use of an electronic medical/health record system                    | 654                       | 74 | 510                     | 76 | 6.27     | 1  | .012  |
| Patient population on Medicaid                                       |                           |    |                         |    | 3.43     | 3  | .33   |
| < 10%                                                                | 205                       | 25 | 165                     | 25 |          |    |       |
| 10-24%                                                               | 193                       | 23 | 152                     | 23 |          |    |       |
| 25-49%                                                               | 216                       | 26 | 182                     | 27 |          |    |       |
| 50-100%                                                              | 219                       | 26 | 170                     | 25 |          |    |       |
| State: Missouri                                                      | 806                       | 87 | 574                     | 86 | 4.45     | 1  | .035  |
| Urban setting                                                        | 601                       | 65 | 418                     | 62 | 7.00     | 1  | .008  |
| <b>Prescribing trends</b>                                            |                           |    |                         |    |          |    |       |
| Percent of adult patients taking antipsychotics in a typical week    |                           |    |                         |    | 1.90     | 1  | .168  |
| 0-49                                                                 | 697                       | 83 | 547                     | 82 |          |    |       |
| 50-100                                                               | 146                       | 17 | 122                     | 18 |          |    |       |
| Percent provider has personally prescribed                           |                           |    |                         |    | 10.02    | 2  | .007  |
| None                                                                 | 145                       | 17 | 103                     | 15 |          |    |       |
| Jan-49                                                               | 406                       | 49 | 326                     | 49 |          |    |       |
| 50-100                                                               | 286                       | 34 | 240                     | 36 |          |    |       |
| Oral SGA prescriptions per unique adult patients on Medicaid in 2011 |                           |    |                         |    | 1.55     | 3  | .671  |
| 0-1                                                                  | 232                       | 25 | 171                     | 26 |          |    |       |
| 1.1-3.9                                                              | 236                       | 26 | 170                     | 25 |          |    |       |
| 4-5.9                                                                | 208                       | 23 | 155                     | 23 |          |    |       |
| 6 or more                                                            | 248                       | 27 | 173                     | 26 |          |    |       |
| <b>Intent (response = definitely)</b>                                |                           |    |                         |    |          |    |       |
| Order baseline glucose test?                                         | 372                       | 41 | 260                     | 39 | 3.67     | 1  | .055  |
| Order glucose test at annual visit?                                  | 539                       | 59 | 393                     | 59 | .13      | 1  | .716  |
| <b>Barriers</b>                                                      |                           |    |                         |    |          |    |       |
| <b>Patient Agree strongly...</b>                                     |                           |    |                         |    |          |    |       |
| Patients forget to get lab work done.                                | 213                       | 24 | 159                     | 24 | .01      | 1  | .904  |
| Patients do not see screening as a priority.                         | 154                       | 18 | 123                     | 18 | .15      | 1  | .697  |
| Fasting makes it difficult for patients to comply.                   | 93                        | 10 | 62                      | 9  | 3.12     | 1  | .077  |
| The time or transportation is inconvenient.                          | 85                        | 10 | 63                      | 9  | 1.46     | 1  | .226  |
| <b>Practice</b>                                                      |                           |    |                         |    |          |    |       |
| <b>Agree strongly...</b>                                             |                           |    |                         |    |          |    |       |
| I do not have the necessary equipment.                               | 144                       | 16 | 95                      | 14 | 6.56     | 1  | .010  |
| I have difficulty getting the lab results.                           | 110                       | 12 | 84                      | 13 | .29      | 1  | .589  |
| <b>Disagree strongly...</b>                                          |                           |    |                         |    |          |    |       |
| Screening adds complexity to my workload.                            | 339                       | 38 | 258                     | 39 | 1.15     | 1  | .283  |
| <b>System Disagree strongly...</b>                                   |                           |    |                         |    |          |    |       |

|                                                                           | Primary cohort<br>(N=924) |    | Model cohort<br>(N=669) |    | $\chi^2$ | df | p     |
|---------------------------------------------------------------------------|---------------------------|----|-------------------------|----|----------|----|-------|
|                                                                           | N                         | %  | N                       | %  |          |    |       |
| Metabolic screening is not a priority for my organization.                | 494                       | 58 | 396                     | 59 | .84      | 1  | .359  |
| <b>Attitudes (response =agree strongly or very confident)</b>             |                           |    |                         |    |          |    |       |
| <b>Advocacy</b>                                                           |                           |    |                         |    |          |    |       |
| Promoters <sup>a</sup>                                                    | 449                       | 52 | 350                     | 52 | .03      | 1  | .854  |
| <b>Responsibility</b>                                                     |                           |    |                         |    |          |    |       |
| My practice is responsible for screening.                                 | 630                       | 69 | 481                     | 72 | 8.44     | 1  | .004  |
| <b>Knowledge</b>                                                          |                           |    |                         |    |          |    |       |
| All adults starting SGAs should be screened.                              | 515                       | 57 | 372                     | 56 | .88      | 1  | .349  |
| <b>Response efficacy</b>                                                  |                           |    |                         |    |          |    |       |
| My patients are at high risk for diabetes.                                | 369                       | 41 | 284                     | 42 | 2.27     | 1  | .132  |
| <b>Self-efficacy</b>                                                      |                           |    |                         |    |          |    |       |
| I am confident interpreting blood glucose values and diagnosing diabetes. | 732                       | 80 | 555                     | 83 | 11.52    | 1  | <.001 |

SOURCE: Author's analysis of data from Care Management Technologies (CMT), Missouri Medicaid claims data, and the provider survey.

NOTES: Missing/skipped values have been excluded when < 10%. Percentages within categories may not add to 100% due to rounding. Test statistics, degrees of freedom (df), and p-values (p) are from Pearson's chi-square test of association comparing characteristics between primary cohort providers included and excluded from the model cohort. CMHC = Community Mental Health Center; SGA = second-generation antipsychotic.

**Exhibit A8. Unadjusted and adjusted relative risk of knowledge related to metabolic screening**

Outcome = Knowledge: all adults starting SGA drugs should have a baseline glucose and lipid test. (agree strongly)

|                                                                      | Unadjusted    |             | Adjusted      |             |
|----------------------------------------------------------------------|---------------|-------------|---------------|-------------|
|                                                                      | Response rate | CI          | Response rate | CI          |
| <b>Provider</b>                                                      |               |             |               |             |
| Specialty-Setting                                                    |               |             |               |             |
| Behavioral health (CMHC)                                             | Reference     |             | Reference     |             |
| Behavioral health (non-CMHC)                                         | .71           | (.59-.85)   | .62           | (.40-.92)   |
| Primary care                                                         | .62           | (.54-.71)   | .58           | (.47-.74)   |
| Other                                                                | .45           | (.34-.60)   | .35           | (.20-.59)   |
| Year of birth                                                        |               |             |               |             |
| G.I./silent generation (1901-1945)                                   | 1.00          | (.77-1.30)  | 1.06          | (.91-1.23)  |
| Baby boomers (1946-1964)                                             | 1.04          | (.90-1.19)  | .88           | (.63-1.15)  |
| Generation X (1965-1985)                                             | Reference     |             | Reference     |             |
| Female                                                               | 1.10          | (.96-1.26)  | 1.06          | (.92-1.21)  |
| Race: White versus other                                             | .74           | (.64-.85)   | .78           | (.67-.92)   |
| <b>Practice</b>                                                      |               |             |               |             |
| Practice type: stand-alone versus multi-site                         | .86           | (.75-1.00)  | .92           | (.79-1.07)  |
| Shared mental health and medical health facilities versus separate   | 1.02          | (.88-1.20)  | 1.06          | (.89-1.24)  |
| Use of an electronic medical/health record system: yes versus no     | .92           | (.79-1.07)  | .99           | (.83-1.18)  |
| Patient population on Medicaid                                       |               |             |               |             |
| < 10%                                                                | Reference     |             | Reference     |             |
| 10-24%                                                               | .84           | (.68-1.04)  | .85           | (.68-1.04)  |
| 25-49%                                                               | .95           | (.78-1.14)  | .88           | (.72-1.06)  |
| 50-100%                                                              | 1.10          | (.93-1.32)  | .94           | (.72-1.18)  |
| State: Missouri versus bordering state                               | 1.23          | (.98-1.55)  | 1.12          | (.91-1.46)  |
| Urban setting                                                        | 1.07          | (.92-1.23)  | 1.01          | (.87-1.15)  |
| <b>Prescribing trends</b>                                            |               |             |               |             |
| Percent of adult patients taking antipsychotics in a typical week    |               |             |               |             |
| 0-49                                                                 | Reference     |             | Reference     |             |
| 50-100                                                               | 1.29          | (1.11-1.49) | .98           | (.76-1.25)  |
| Percent provider has personally prescribed                           |               |             |               |             |
| None                                                                 | Reference     |             | Reference     |             |
| 1-49                                                                 | 1.40          | (1.09-1.79) | 1.27          | (1.02-1.56) |
| 50-100                                                               | 1.39          | (1.08-1.79) | 1.07          | (1.02-1.56) |
| Oral SGA prescriptions per unique adult patients on Medicaid in 2011 |               |             |               |             |
| 0-1                                                                  | Reference     |             | Reference     |             |
| 1.1-3.9                                                              | 1.02          | (.82-1.26)  | 1.02          | (.85-1.21)  |
| 4-5.9                                                                | 1.27          | (1.05-1.54) | 1.21          | (1.00-1.42) |
| 6 or more                                                            | 1.20          | (.99-1.45)  | 1.09          | (.91-1.29)  |

SOURCE: Author's analysis of data from the provider survey, ProviderPRO healthcare provider database, and 2011 Missouri Medicaid claims data. NOTES: Reported results are relative risk (95% confidence intervals). Multivariable log-binomial regression was used to model each outcome with the primary predictor of provider specialty. Adjusted relative risk results control for all variables presented in the table. Available sample size for the modeling was 669. CMHC = Community Mental Health Center; SGA = second-generation antipsychotic.

**Exhibit A9. Unadjusted and adjusted relative risk of responsibility related to metabolic screening**

Outcome = Responsibility: my practice is responsible for glucose and lipid screening for patients taking antipsychotic medication. (agree strongly)

|                                                                      | Unadjusted    |             | Adjusted      |             |
|----------------------------------------------------------------------|---------------|-------------|---------------|-------------|
|                                                                      | Response rate | CI          | Response rate | CI          |
| <b>Provider</b>                                                      |               |             |               |             |
| Specialty-Setting                                                    |               |             |               |             |
| Behavioral health (CMHC)                                             | Reference     |             | Reference     |             |
| Behavioral health (non-CMHC)                                         | .95           | (.77-1.17)  | .99           | (.80-1.14)  |
| Primary care                                                         | 1.22          | (1.03-1.43) | 1.36          | (1.09-1.82) |
| Other                                                                | .35           | (.24-.52)   | .57           | (.32-.84)   |
| Year of birth                                                        |               |             |               |             |
| G.I./silent generation (1901-1945)                                   | .97           | (.80-1.19)  | 1.13          | (1.03-1.23) |
| Baby boomers (1946-1964)                                             | 1.09          | (.98-1.20)  | 1.01          | (.86-1.16)  |
| Generation X (1965-1985)                                             | Reference     |             | Reference     |             |
| Female                                                               | 1.09          | (.99-1.20)  | 1.09          | (.99-1.20)  |
| Race: White versus other                                             | 1.03          | (.91-1.17)  | .97           | (.88-1.09)  |
| <b>Practice</b>                                                      |               |             |               |             |
| Practice type: stand-alone versus multi-site                         | 1.00          | (.91-1.10)  | 1.00          | (.91-1.10)  |
| Shared mental health and medical health facilities versus separate   | .98           | (.88-1.10)  | 1.09          | (.99-1.20)  |
| Use of an electronic medical/health record system: yes versus no     | 1.09          | (.97-1.23)  | 1.07          | (.96-1.21)  |
| Patient population on Medicaid                                       |               |             |               |             |
| < 10%                                                                | Reference     |             | Reference     |             |
| 10-24%                                                               | 1.00          | (.88-1.15)  | 1.00          | (.87-1.12)  |
| 25-49%                                                               | .99           | (.87-1.13)  | .98           | (.85-1.09)  |
| 50-100%                                                              | 1.00          | (.87-1.14)  | 1.05          | (.88-1.17)  |
| State: Missouri versus bordering state                               | 1.12          | (.96-1.31)  | .95           | (.84-1.10)  |
| Urban setting                                                        | .84           | (.76-.92)   | .91           | (.84-1.00)  |
| <b>Prescribing trends</b>                                            |               |             |               |             |
| Percent of adult patients taking antipsychotics in a typical week    |               |             |               |             |
| 0-49                                                                 | Reference     |             | Reference     |             |
| 50-100                                                               | .98           | (.86-1.11)  | 1.00          | (.85-1.15)  |
| Percent provider has personally prescribed                           |               |             |               |             |
| None                                                                 | Reference     |             | Reference     |             |
| 1-49                                                                 | 1.43          | (1.18-1.73) | 1.12          | (.97-1.28)  |
| 50-100                                                               | 1.38          | (1.14-1.68) | 1.19          | (1.03-1.38) |
| Oral SGA prescriptions per unique adult patients on Medicaid in 2011 |               |             |               |             |
| 0-1                                                                  | Reference     |             | Reference     |             |
| 1.1-3.9                                                              | 1.24          | (1.07-1.44) | 1.09          | (.96-1.20)  |
| 4-5.9                                                                | 1.33          | (1.15-1.54) | 1.13          | (1.01-1.25) |
| 6 or more                                                            | 1.22          | (1.05-1.42) | 1.07          | (.94-1.19)  |

SOURCE: Author's analysis of data from the provider survey, ProviderPRO healthcare provider database, and 2011 Missouri Medicaid claims data. NOTES: Reported results are relative risk (95% confidence intervals). Multivariable log-binomial regression was used to model each outcome with the primary predictor of provider specialty. Adjusted relative risk results control for all variables presented in the table. Available sample size for the modeling was 669. CMHC = Community Mental Health Center; SGA = second-generation antipsychotic.

**Exhibit A10. Unadjusted and adjusted relative risk of response efficacy related to metabolic screening**

Outcome = Response efficacy: my patients are at high risk for diabetes. (agree strongly)

|                                                           | Unadjusted    |             | Adjusted      |             |
|-----------------------------------------------------------|---------------|-------------|---------------|-------------|
|                                                           | Response rate | CI          | Response rate | CI          |
| <b>Provider</b>                                           |               |             |               |             |
| Specialty-Setting                                         |               |             |               |             |
| Behavioral health (CMHC)                                  | Reference     |             | Reference     |             |
| Behavioral health (non-CMHC)                              | .76           | (.57-1.01)  | .75           | (.47-1.14)  |
| Primary care                                              | .70           | (.56-.87)   | .72           | (.52-1.05)  |
| Other                                                     | .52           | (.36-.75)   | .51           | (.28-.87)   |
| Year of birth                                             |               |             |               |             |
| G.I./silent generation (1901-1945)                        | .82           | (.58-1.16)  | 1.08          | (.89-1.29)  |
| Baby Boomers (1946-1964)                                  | .78           | (.65-.93)   | .75           | (.46-1.09)  |
| Generation X (1965-1985)                                  | Reference     |             | Reference     |             |
| Female                                                    | 1.16          | (.97-1.38)  | .79           | (.64-.95)   |
| Race: White versus other                                  | .74           | (.61-.90)   | .79           | (.65-1.00)  |
| <b>Practice</b>                                           |               |             |               |             |
| Practice type: stand-alone versus multi-site              | .84           | (.70-1.01)  | .91           | (.73-1.10)  |
| Shared mental health and medical health facilities versus | 1.01          | (.82-1.24)  | 1.05          | (.82-1.29)  |
| Use of an electronic medical/health record system: yes    | 1.07          | (.87-1.33)  | 1.12          | (.91-1.44)  |
| Patient population on Medicaid                            |               |             |               |             |
| < 10%                                                     | Reference     |             | Reference     |             |
| 10-24%                                                    | .80           | (.61-1.06)  | .75           | (.55-.98)   |
| 25-49%                                                    | .89           | (.70-1.15)  | .78           | (.57-1.01)  |
| 50-100%                                                   | 1.19          | (.95-1.49)  | .96           | (.71-1.31)  |
| State: Missouri versus bordering state                    | .98           | (.76-1.26)  | .81           | (.65-1.08)  |
| Urban setting                                             | .95           | (.79-1.14)  | .91           | (.75-1.11)  |
| <b>Prescribing trends</b>                                 |               |             |               |             |
| Percent of adult patients taking antipsychotics in a      |               |             |               |             |
| 0-49                                                      | Reference     |             | Reference     |             |
| 50-100                                                    | 1.28          | (1.05-1.56) | 1.05          | (.76-1.38)  |
| Percent provider has personally prescribed                |               |             |               |             |
| None                                                      | Reference     |             | Reference     |             |
| 1-49                                                      | 1.20          | (.90-1.59)  | 1.06          | (.82-1.40)  |
| 50-100                                                    | 1.24          | (.92-1.67)  | .98           | (.71-1.32)  |
| Oral SGA prescriptions per unique adult patients on       |               |             |               |             |
| 0-1                                                       | Reference     |             | Reference     |             |
| 1.1-3.9                                                   | 1.14          | (.87-1.49)  | 1.14          | (.88-1.43)  |
| 4-5.9                                                     | 1.39          | (1.08-1.80) | 1.39          | (1.09-1.72) |
| 6 or more                                                 | 1.25          | (.96-1.62)  | 1.25          | (.96-1.55)  |

SOURCE: Author's analysis of data from the provider survey, ProviderPRO healthcare provider database, and 2011 Missouri Medicaid claims data. NOTES: Reported results are relative risk (95% confidence intervals). Multivariable log-binomial regression was used to model each outcome with the primary predictor of provider specialty. Adjusted relative risk results control for all variables presented in the table. Available sample size for the modeling was 669. CMHC = Community Mental Health Center; SGA = second-generation antipsychotic.

**Exhibit A11. Unadjusted and adjusted relative risk of self-efficacy related to metabolic screening**

Outcome = Self-efficacy: interpreting blood glucose values and diagnosing diabetes. (very confident)

|                                                                      | Unadjusted    |             | Adjusted      |             |
|----------------------------------------------------------------------|---------------|-------------|---------------|-------------|
|                                                                      | Response rate | CI          | Response rate | CI          |
| <b>Provider</b>                                                      |               |             |               |             |
| Specialty-Setting                                                    |               |             |               |             |
| Behavioral health (CMHC)                                             | Reference     |             | Reference     |             |
| Behavioral health (non-CMHC)                                         | .99           | (.78-1.25)  | .99           | (.87-1.09)  |
| Primary care                                                         | 1.55          | (1.29-1.87) | 1.46          | (1.25-1.79) |
| Other                                                                | 1.02          | (.80-1.29)  | 1.02          | (.89-1.14)  |
| Year of birth                                                        |               |             |               |             |
| G.I./silent generation (1901-1945)                                   | .99           | (.86-1.13)  | .98           | (.91-1.05)  |
| Baby boomers (1946-1964)                                             | 1.01          | (.94-1.08)  | 1.05          | (.94-1.15)  |
| Generation X (1965-1985)                                             | Reference     |             | Reference     |             |
| Female                                                               | .93           | (.86-1.00)  | 1.00          | (.94-1.07)  |
| Race: White versus other                                             | .97           | (.89-1.05)  | .91           | (.85-.99)   |
| <b>Practice</b>                                                      |               |             |               |             |
| Practice type: stand-alone versus multi-site                         | 1.04          | (.97-1.12)  | .99           | (.92-1.06)  |
| Shared mental health and medical health facilities versus separate   | .99           | (.91-1.08)  | 1.07          | (.98-1.14)  |
| Use of an electronic medical/health record system: yes versus no     | 1.08          | (.99-1.19)  | .99           | (.93-1.07)  |
| Patient Population on Medicaid                                       |               |             |               |             |
| < 10%                                                                | Reference     |             | Reference     |             |
| 10-24%                                                               | 1.02          | (.94-1.11)  | 1.01          | (.90-1.11)  |
| 25-49%                                                               | .96           | (.88-1.05)  | .97           | (.87-1.07)  |
| 50-100%                                                              | .86           | (.77-.95)   | .96           | (.86-1.08)  |
| State: Missouri versus bordering state                               | 1.21          | (1.05-1.38) | .99           | (.91-1.09)  |
| Urban setting                                                        | .87           | (.82-.93)   | .94           | (.88-1.01)  |
| <b>Prescribing trends</b>                                            |               |             |               |             |
| Percent of adult patients taking antipsychotics in a typical week    |               |             |               |             |
| 0-49                                                                 | Reference     |             | Reference     |             |
| 50-100                                                               | .74           | (.65-.85)   | .99           | (.89-1.08)  |
| Percent provider has personally prescribed                           |               |             |               |             |
| None                                                                 | Reference     |             | Reference     |             |
| 1-49                                                                 | 1.20          | (1.08-1.35) | 1.15          | (1.03-1.26) |
| 50-100                                                               | .95           | (.83-1.08)  | 1.07          | (.96-1.18)  |
| Oral SGA prescriptions per unique adult patients on Medicaid in 2011 |               |             |               |             |
| 0-1                                                                  | Reference     |             | Reference     |             |
| 1.1-3.9                                                              | 1.18          | (1.06-1.31) | 1.06          | (.97-1.14)  |
| 4-5.9                                                                | 1.20          | (1.08-1.33) | 1.05          | (.96-1.14)  |
| 6 or more                                                            | 1.13          | (1.01-1.26) | 1.04          | (.96-1.12)  |

SOURCE: Author's analysis of data from the provider survey, ProviderPRO healthcare provider database, and 2011 Missouri Medicaid claims data. NOTES: Reported results are relative risk (95% confidence intervals). Multivariable log-binomial regression was used to model each outcome with the primary predictor of provider specialty. Adjusted relative risk results control for all variables presented in the table. Available sample size for the modeling was 669. CMHC = Community Mental Health Center; SGA = second-generation antipsychotic.

**Exhibit A12. Unadjusted and adjusted relative risk of advocacy related to metabolic screening**

Outcome = Advocacy: how likely are you to recommend glucose testing for adults taking antipsychotics to a colleague? (promoter)

|                                                                      | Unadjusted    |             | Adjusted      |             |
|----------------------------------------------------------------------|---------------|-------------|---------------|-------------|
|                                                                      | Response rate | CI          | Response rate | CI          |
| <b>Provider</b>                                                      |               |             |               |             |
| Specialty-Setting                                                    |               |             |               |             |
| Behavioral health (CMHC)                                             | Reference     |             | Reference     |             |
| Behavioral health (non-CMHC)                                         | .89           | (.72-1.08)  | .92           | (.61-1.31)  |
| Primary care                                                         | .68           | (.57-.81)   | .73           | (.54-.97)   |
| Other                                                                | .49           | (.36-.67)   | .52           | (.29-.84)   |
| Year of birth                                                        |               |             |               |             |
| G.I./silent generation (1901-1945)                                   | 1.01          | (.76-1.32)  | 1.09          | (.93-1.26)  |
| Baby boomers (1946-1964)                                             | 1.00          | (.86-1.16)  | .85           | (.58-1.15)  |
| Generation X (1965-1985)                                             | Reference     |             | Reference     |             |
| Female                                                               | 1.15          | (1.00-1.33) | 1.01          | (.86-1.16)  |
| Race: White versus other                                             | .83           | (.70-.97)   | .88           | (.74-1.07)  |
| <b>Practice</b>                                                      |               |             |               |             |
| Practice type: stand-alone versus multi-site                         | .95           | (.82-1.10)  | .99           | (.85-1.15)  |
| Shared mental health and medical health facilities versus separate   | 1.04          | (.89-1.23)  | 1.07          | (.89-1.26)  |
| Use of an electronic medical/health record system: yes versus no     | .89           | (.76-1.04)  | .95           | (.80-1.14)  |
| Patient population on Medicaid                                       |               |             |               |             |
| < 10%                                                                | Reference     |             | Reference     |             |
| 10-24%                                                               | 1.07          | (.86-1.33)  | 1.09          | (.89-1.34)  |
| 25-49%                                                               | .97           | (.78-1.21)  | .95           | (.76-1.17)  |
| 50-100%                                                              | 1.22          | (1.00-1.49) | 1.08          | (.86-1.37)  |
| State: Missouri versus bordering state                               | 1.04          | (.84-1.29)  | 1.02          | (.82-1.33)  |
| Urban setting                                                        | 1.15          | (.99-1.34)  | 1.12          | (.94-1.32)  |
| <b>Prescribing trends</b>                                            |               |             |               |             |
| Percent of adult patients taking antipsychotics in a typical week    |               |             |               |             |
| 0-49                                                                 | Reference     |             | Reference     |             |
| 50-100                                                               | 1.33          | (1.14-1.55) | 1.10          | (.83-1.37)  |
| Percent provider has personally prescribed                           |               |             |               |             |
| None                                                                 | Reference     |             | Reference     |             |
| 1-49                                                                 | 1.54          | (1.17-2.03) | 1.33          | (1.08-1.67) |
| 50-100                                                               | 1.54          | (1.16-2.04) | 1.12          | (.86-1.44)  |
| Oral SGA prescriptions per unique adult patients on Medicaid in 2011 |               |             |               |             |
| 0-1                                                                  | Reference     |             | Reference     |             |
| 1.1-3.9                                                              | 1.11          | (.89-1.38)  | 1.12          | (.91-1.34)  |
| 4-5.9                                                                | 1.19          | (.95-1.48)  | 1.15          | (.93-1.38)  |
| 6 or more                                                            | 1.29          | (1.05-1.59) | 1.20          | (.98-1.44)  |

SOURCE: Author's analysis of data from the provider survey, ProviderPRO healthcare provider database, and 2011 Missouri Medicaid claims data. NOTES: Reported results are relative risk (95% confidence intervals). Multivariable log-binomial regression was used to model each outcome with the primary predictor of provider specialty. Adjusted relative risk results control for all variables presented in the table. Available sample size for the modeling was 669. CMHC = Community Mental Health Center; SGA = second-generation antipsychotic.

**Exhibit A13. Unadjusted and adjusted relative risk of practice barriers related to metabolic screening**

Outcome = Practice Barriers: I do not have the necessary equipment at my office/clinic. (agree strongly)

|                                                                      | Unadjusted    |             | Adjusted      |            |
|----------------------------------------------------------------------|---------------|-------------|---------------|------------|
|                                                                      | Response rate | CI          | Response rate | CI         |
| <b>Provider</b>                                                      |               |             |               |            |
| Specialty-Setting                                                    |               |             |               |            |
| Behavioral health (CMHC)                                             | Reference     |             | Reference     |            |
| Behavioral health (non-CMHC)                                         | 1.00          | (.71-1.43)  | 1.02          | (.61-1.96) |
| Primary care                                                         | .06           | (.03-.12)   | .05           | (.02-.15)  |
| Other                                                                | .26           | (.14-.50)   | .23           | (.07-.59)  |
| Year of birth                                                        |               |             |               |            |
| G.I./silent generation (1901-1945)                                   | 2.70          | (1.61-4.53) | .91           | (.62-1.32) |
| Baby boomers (1946-1964)                                             | 1.20          | (.78-1.83)  | 1.34          | (.77-2.25) |
| Generation X (1965-1985)                                             | Reference     |             | Reference     |            |
| Female                                                               | 1.13          | (.77-1.66)  | 1.11          | (.79-1.61) |
| Race: White versus other                                             | .42           | (.29-.62)   | .65           | (.45-.95)  |
| <b>Practice</b>                                                      |               |             |               |            |
| Practice type: stand-alone versus multi-site                         | 1.29          | (.89-1.87)  | 1.45          | (.98-2.21) |
| Shared mental health and medical health facilities versus separate   | .29           | (.15-.60)   | .28           | (.10-.52)  |
| Use of an electronic medical/health record system: yes versus no     | .43           | (.30-.62)   | .92           | (.67-1.30) |
| Patient population on Medicaid                                       |               |             |               |            |
| < 10%                                                                | Reference     |             | Reference     |            |
| 10-24%                                                               | 1.09          | (.59-2.01)  | 1.42          | (.87-2.14) |
| 25-49%                                                               | 1.36          | (.78-2.38)  | 1.49          | (.97-2.32) |
| 50-100%                                                              | 1.73          | (1.01-2.95) | .89           | (.51-1.56) |
| State: Missouri versus bordering state                               | .55           | (.36-.84)   | 1.04          | (.69-1.78) |
| Urban setting                                                        | 1.78          | (1.15-2.75) | 1.04          | (.72-1.55) |
| <b>Prescribing trends</b>                                            |               |             |               |            |
| Percent of adult patients taking antipsychotics in a typical week    |               |             |               |            |
| 0-49                                                                 | Reference     |             | Reference     |            |
| 50-100                                                               | 3.26          | (2.28-4.66) | 1.10          | (.70-1.67) |
| Percent provider has personally prescribed                           |               |             |               |            |
| None                                                                 | Reference     |             | Reference     |            |
| 1-49                                                                 | .73           | (.36-1.48)  | .67           | (.34-1.26) |
| 50-100                                                               | 2.66          | (1.42-4.98) | .74           | (.46-1.51) |
| Oral SGA prescriptions per unique adult patients on Medicaid in 2011 |               |             |               |            |
| 0-1                                                                  | Reference     |             | Reference     |            |
| 1.1-3.9                                                              | .66           | (.38-1.13)  | .99           | (.56-1.54) |
| 4-5.9                                                                | .68           | (.40-1.18)  | .82           | (.48-1.24) |
| 6 or more                                                            | .99           | (.62-1.58)  | .75           | (.45-1.21) |

SOURCE: Author's analysis of data from the provider survey, ProviderPRO healthcare provider database, and 2011 Missouri Medicaid claims data. NOTES: Reported results are relative risk (95% confidence intervals). Multivariable log-binomial regression was used to model each outcome with the primary predictor of provider specialty. Adjusted relative risk results control for all variables presented in the table. Available sample size for the modeling was 669.

CMHC = Community Mental Health Center; SGA = second-generation antipsychotic.



**Exhibit A14. Unadjusted and adjusted relative risk of system barriers related to metabolic screening**

Outcome = System Barriers: at this time, metabolic screening is not a priority for me or my organization. (disagree strongly)

|                                                           | Unadjusted    |              | Adjusted      |             |
|-----------------------------------------------------------|---------------|--------------|---------------|-------------|
|                                                           | Response rate | CI           | Response rate | CI          |
| <b>Provider</b>                                           |               |              |               |             |
| Specialty-Setting                                         |               |              |               |             |
| Behavioral health (CMHC)                                  | Reference     |              | Reference     |             |
| Behavioral health (non-CMHC)                              | .66           | (.56-.79)    | .49           | (.31-.74)   |
| Primary care                                              | .69           | (.61-.77)    | .67           | (.55-.85)   |
| Other                                                     | .35           | (.26-.48)    | .24           | (.13-.42)   |
| Year of birth                                             |               |              |               |             |
| G.I./silent generation (1901-1945)                        | 1.03          | (.81-1.31)   | 1.27          | (1.11-1.44) |
| Baby boomers (1946-1964)                                  | 1.03          | (.90-1.17)   | 1.00          | (.76-1.24)  |
| Generation X (1965-1985)                                  | Reference     |              | Reference     |             |
| Female                                                    | 1.29          | (1.14-1.45)  | 1.04          | (.91-1.19)  |
| Race: White versus other                                  | .92           | (.79-1.07)   | .95           | (.80-1.16)  |
| <b>Practice</b>                                           |               |              |               |             |
| Practice type: stand-alone versus multi-site              | .91           | (.80-1.04)   | .97           | (.85-1.11)  |
| Shared mental health and medical health facilities versus | .93           | (.80-1.09)   | 1.00          | (.85-1.17)  |
| Use of an electronic medical/health record system: yes    | .96           | (.83-1.11)   | 1.02          | (.87-1.24)  |
| Patient population on Medicaid                            |               |              |               |             |
| < 10%                                                     | Reference     |              | Reference     |             |
| 10-24%                                                    | 1.03          | (.85-1.24)   | 1.03          | (.86-1.22)  |
| 25-49%                                                    | .97           | (.81-1.17)   | .91           | (.75-1.08)  |
| 50-100%                                                   | 1.16          | (.97-1.37)   | 1.00          | (.78-1.22)  |
| State: Missouri versus bordering state                    | 1.05          | (.87-1.26)   | .92           | (.78-1.11)  |
| Urban setting                                             | 1.00          | (.87-1.13)   | 1.00          | (.88-1.14)  |
| <b>Prescribing trends</b>                                 |               |              |               |             |
| Percent of adult patients taking antipsychotics in a      |               |              |               |             |
| 0-49                                                      | Reference     |              | Reference     |             |
| 50-100                                                    | 1.30          | (1.14-1.48)  | 1.04          | (.82-1.27)  |
| Percent provider has personally prescribed                |               |              |               |             |
| None                                                      | Reference     |              | Reference     |             |
| 1-49                                                      | 1.33          | (1.06-1.68)  | 1.10          | (.92, 1.33) |
| 50-100                                                    | 1.46          | (1.15,-1.84) | 1.11          | (.88-1.34)  |
| Oral SGA prescriptions per unique adult patients on       |               |              |               |             |
| 0-1                                                       | Reference     |              | Reference     |             |
| 1.1-3.9                                                   | 1.08          | (.90-1.31)   | 1.04          | (.87-1.22)  |
| 4-5.9                                                     | 1.15          | (.96-1.39)   | 1.08          | (.90-1.27)  |
| 6 or more                                                 | 1.17          | (.98-1.40)   | 1.07          | (.87-1.24)  |

SOURCE: Author's analysis of data from the provider survey, ProviderPRO healthcare provider database, and 2011 Missouri Medicaid claims data. NOTES: Reported results are relative risk (95% confidence intervals). Multivariable log-binomial regression was used to model each outcome with the primary predictor of provider specialty. Adjusted relative risk results control for all variables presented in the table. Available sample size for the modeling was 669.

CMHC = Community Mental Health Center; SGA = second-generation antipsychotic.
